# Supplementary material for: Bader’s Topological Bond Path Does Not Necessarily Indicate Stabilizing Interaction—Proof Studies Based on the Ng@[3n]cyclophane Endohedral Complexes
Source: MDPI journal article supplement (doi:10.3390/molecules28176353), 2023-08-30
Supplement: s1 [file s1]

# **Bader's Topological Bond Path Does Not Necessarily Indicate Stabilizing Interaction—Proof Studies Based on the Ng@[3<sub>n</sub>]cyclophane Endohedral Complexes**

Mirosław Jabłoński

Faculty of Chemistry, Nicolaus Copernicus University in Toruń, Gagarina 7,  
87-100 Toruń, Poland  
teojab@chem.umk.pl; Tel.: +48-056-611-4695

## **SUPPORTING INFORMATION**

# Cartesian coordinates of considered systems

## I) Cyclophanes

[3<sub>6</sub>](1,2,3,4,5,6) – D<sub>6h</sub>

|   |           |           |           |
|---|-----------|-----------|-----------|
| 6 | 0.000000  | 1.402998  | 1.459253  |
| 6 | -1.215032 | 0.701499  | 1.459253  |
| 6 | 1.215032  | 0.701499  | 1.459253  |
| 6 | 0.000000  | 1.402998  | -1.459253 |
| 6 | 1.215032  | 0.701499  | -1.459253 |
| 6 | -1.215032 | 0.701499  | -1.459253 |
| 6 | -0.000000 | -1.402998 | -1.459253 |
| 6 | 1.215032  | -0.701499 | -1.459253 |
| 6 | -1.215032 | -0.701499 | -1.459253 |
| 6 | -0.000000 | -1.402998 | 1.459253  |
| 6 | -1.215032 | -0.701499 | 1.459253  |
| 6 | 1.215032  | -0.701499 | 1.459253  |
| 6 | 0.000000  | 3.643602  | -0.000000 |
| 1 | 0.866164  | 4.309989  | 0.000000  |
| 1 | -0.866164 | 4.309989  | -0.000000 |
| 6 | 0.000000  | 2.915869  | 1.388077  |
| 1 | -0.857592 | 3.290466  | 1.944593  |
| 1 | 0.857592  | 3.290466  | 1.944593  |
| 6 | 0.000000  | 2.915869  | -1.388077 |
| 1 | 0.857592  | 3.290466  | -1.944593 |
| 1 | -0.857592 | 3.290466  | -1.944593 |
| 6 | 2.525216  | 1.457934  | 1.388077  |
| 1 | 3.278423  | 0.902536  | 1.944593  |
| 1 | 2.420831  | 2.387929  | 1.944593  |
| 6 | 3.155452  | 1.821801  | -0.000000 |
| 1 | 4.165642  | 1.404875  | 0.000000  |
| 1 | 3.299478  | 2.905114  | -0.000000 |
| 6 | 2.525216  | 1.457934  | -1.388077 |
| 1 | 3.278423  | 0.902536  | -1.944593 |
| 1 | 2.420831  | 2.387929  | -1.944593 |
| 6 | 2.525216  | -1.457934 | 1.388077  |
| 1 | 3.278423  | -0.902536 | 1.944593  |
| 1 | 2.420831  | -2.387929 | 1.944593  |
| 6 | 3.155452  | -1.821801 | -0.000000 |
| 1 | 3.299478  | -2.905114 | 0.000000  |
| 1 | 4.165642  | -1.404875 | -0.000000 |
| 6 | 2.525216  | -1.457934 | -1.388077 |
| 1 | 2.420831  | -2.387929 | -1.944593 |
| 1 | 3.278423  | -0.902536 | -1.944593 |
| 6 | -0.000000 | -2.915869 | 1.388077  |
| 1 | -0.857592 | -3.290466 | 1.944593  |
| 1 | 0.857592  | -3.290466 | 1.944593  |
| 6 | -0.000000 | -3.643602 | -0.000000 |
| 1 | -0.866164 | -4.309989 | 0.000000  |
| 1 | 0.866164  | -4.309989 | -0.000000 |
| 6 | -0.000000 | -2.915869 | -1.388077 |
| 1 | -0.857592 | -3.290466 | -1.944593 |
| 1 | 0.857592  | -3.290466 | -1.944593 |
| 6 | -2.525216 | -1.457934 | 1.388077  |
| 1 | -3.278423 | -0.902536 | 1.944593  |
| 1 | -2.420831 | -2.387929 | 1.944593  |
| 6 | -3.155452 | -1.821801 | -0.000000 |
| 1 | -4.165642 | -1.404875 | 0.000000  |

|   |           |           |           |
|---|-----------|-----------|-----------|
| 1 | -3.299478 | -2.905114 | -0.000000 |
| 6 | -2.525216 | -1.457934 | -1.388077 |
| 1 | -3.278423 | -0.902536 | -1.944593 |
| 1 | -2.420831 | -2.387929 | -1.944593 |
| 6 | -2.525216 | 1.457934  | 1.388077  |
| 1 | -2.420831 | 2.387929  | 1.944593  |
| 1 | -3.278423 | 0.902536  | 1.944593  |
| 6 | -3.155452 | 1.821801  | -0.000000 |
| 1 | -3.299478 | 2.905114  | 0.000000  |
| 1 | -4.165642 | 1.404875  | -0.000000 |
| 6 | -2.525216 | 1.457934  | -1.388077 |
| 1 | -2.420831 | 2.387929  | -1.944593 |
| 1 | -3.278423 | 0.902536  | -1.944593 |

$[3_6](1,2,3,4,5,6) - C_{6h} \quad (2)$

|   |           |           |           |
|---|-----------|-----------|-----------|
| 6 | 0.000000  | 1.403170  | 1.480722  |
| 6 | -1.215181 | 0.701585  | 1.480722  |
| 6 | 1.215181  | 0.701585  | 1.480722  |
| 6 | 0.000000  | 1.403170  | -1.480722 |
| 6 | 1.215181  | 0.701585  | -1.480722 |
| 6 | -1.215181 | 0.701585  | -1.480722 |
| 6 | -0.000000 | -1.403170 | -1.480722 |
| 6 | 1.215181  | -0.701585 | -1.480722 |
| 6 | -1.215181 | -0.701585 | -1.480722 |
| 6 | -0.000000 | -1.403170 | 1.480722  |
| 6 | -1.215181 | -0.701585 | 1.480722  |
| 6 | 1.215181  | -0.701585 | 1.480722  |
| 6 | 0.470768  | 3.516724  | 0.000000  |
| 1 | 1.560421  | 3.514151  | 0.000000  |
| 1 | 0.188585  | 4.575486  | 0.000000  |
| 6 | -0.007808 | 2.919131  | 1.348643  |
| 1 | -1.001244 | 3.298780  | 1.575116  |
| 1 | 0.630780  | 3.352704  | 2.125735  |
| 6 | -0.007808 | 2.919131  | -1.348643 |
| 1 | 0.630780  | 3.352704  | -2.125735 |
| 1 | -1.001244 | 3.298780  | -1.575116 |
| 6 | 2.524138  | 1.466328  | 1.348643  |
| 1 | 3.218917  | 1.130081  | 2.125735  |
| 1 | 2.356205  | 2.516493  | 1.575116  |
| 6 | 3.280956  | 1.350664  | 0.000000  |
| 1 | 3.823554  | 0.405712  | 0.000000  |
| 1 | 4.056779  | 2.124423  | 0.000000  |
| 6 | 2.524138  | 1.466328  | -1.348643 |
| 1 | 3.218917  | 1.130081  | -2.125735 |
| 1 | 2.356205  | 2.516493  | -1.575116 |
| 6 | 2.531946  | -1.452804 | 1.348643  |
| 1 | 3.357449  | -0.782287 | 1.575116  |
| 1 | 2.588137  | -2.222624 | 2.125735  |
| 6 | 2.810188  | -2.166059 | 0.000000  |
| 1 | 2.263134  | -3.108439 | 0.000000  |
| 1 | 3.868194  | -2.451062 | 0.000000  |
| 6 | 2.531946  | -1.452804 | -1.348643 |
| 1 | 2.588137  | -2.222624 | -2.125735 |
| 1 | 3.357449  | -0.782287 | -1.575116 |
| 6 | 0.007808  | -2.919131 | 1.348643  |
| 1 | -0.630780 | -3.352704 | 2.125735  |
| 1 | 1.001244  | -3.298780 | 1.575116  |
| 6 | -0.470768 | -3.516724 | 0.000000  |
| 1 | -1.560421 | -3.514151 | 0.000000  |
| 1 | -0.188585 | -4.575486 | 0.000000  |

|   |           |           |           |
|---|-----------|-----------|-----------|
| 6 | 0.007808  | -2.919131 | -1.348643 |
| 1 | -0.630780 | -3.352704 | -2.125735 |
| 1 | 1.001244  | -3.298780 | -1.575116 |
| 6 | -2.524138 | -1.466328 | 1.348643  |
| 1 | -3.218917 | -1.130081 | 2.125735  |
| 1 | -2.356205 | -2.516493 | 1.575116  |
| 6 | -3.280956 | -1.350664 | 0.000000  |
| 1 | -3.823554 | -0.405712 | 0.000000  |
| 1 | -4.056779 | -2.124423 | 0.000000  |
| 6 | -2.524138 | -1.466328 | -1.348643 |
| 1 | -3.218917 | -1.130081 | -2.125735 |
| 1 | -2.356205 | -2.516493 | -1.575116 |
| 6 | -2.531946 | 1.452804  | 1.348643  |
| 1 | -2.588137 | 2.222624  | 2.125735  |
| 1 | -3.357449 | 0.782287  | 1.575116  |
| 6 | -2.810188 | 2.166059  | 0.000000  |
| 1 | -2.263134 | 3.108439  | 0.000000  |
| 1 | -3.868194 | 2.451062  | 0.000000  |
| 6 | -2.531946 | 1.452804  | -1.348643 |
| 1 | -2.588137 | 2.222624  | -2.125735 |
| 1 | -3.357449 | 0.782287  | -1.575116 |

$[3_5](1,2,3,4,5) - C_s$       **(3a)**

|   |           |           |           |
|---|-----------|-----------|-----------|
| 6 | 1.696283  | -0.076078 | 1.601782  |
| 6 | 1.100937  | 1.171955  | 1.516432  |
| 6 | 0.976539  | -1.260422 | 1.533217  |
| 6 | 1.696283  | -0.076078 | -1.601782 |
| 6 | 0.976539  | -1.260422 | -1.533217 |
| 6 | 1.100937  | 1.171955  | -1.516432 |
| 6 | -1.054420 | 0.058369  | -1.481635 |
| 6 | -0.419334 | -1.199536 | -1.485873 |
| 6 | -0.299653 | 1.245062  | -1.478754 |
| 6 | -1.054420 | 0.058369  | 1.481635  |
| 6 | -0.299653 | 1.245062  | 1.478754  |
| 6 | -0.419334 | -1.199536 | 1.485873  |
| 6 | 1.775687  | -2.535464 | 1.339874  |
| 1 | 1.153042  | -3.422658 | 1.456989  |
| 1 | 2.528381  | -2.596999 | 2.134068  |
| 6 | 2.548403  | -2.596288 | 0.000000  |
| 1 | 3.136642  | -3.520820 | 0.000000  |
| 1 | 3.277277  | -1.778785 | 0.000000  |
| 6 | 1.775687  | -2.535464 | -1.339874 |
| 1 | 1.153042  | -3.422658 | -1.456989 |
| 1 | 2.528381  | -2.596999 | -2.134068 |
| 6 | -1.225944 | -2.479493 | 1.347263  |
| 1 | -0.899477 | -3.183485 | 2.120865  |
| 1 | -2.271771 | -2.283651 | 1.576542  |
| 6 | -1.124230 | -3.236536 | 0.000000  |
| 1 | -1.906300 | -4.004055 | 0.000000  |
| 1 | -0.185190 | -3.788970 | 0.000000  |
| 6 | -1.225944 | -2.479493 | -1.347263 |
| 1 | -2.271771 | -2.283651 | -1.576542 |
| 1 | -0.899477 | -3.183485 | -2.120865 |
| 6 | -2.567310 | 0.139017  | 1.346097  |
| 1 | -2.897806 | 1.151989  | 1.565836  |
| 1 | -3.030683 | -0.474992 | 2.126053  |
| 6 | -3.182617 | -0.319404 | 0.000000  |
| 1 | -4.230996 | -0.001011 | 0.000000  |
| 1 | -3.216531 | -1.408398 | 0.000000  |
| 6 | -2.567310 | 0.139017  | -1.346097 |

|   |           |           |           |
|---|-----------|-----------|-----------|
| 1 | -2.897806 | 1.151989  | -1.565836 |
| 1 | -3.030683 | -0.474992 | -2.126053 |
| 6 | -0.967916 | 2.603623  | 1.343532  |
| 1 | -0.235995 | 3.378439  | 1.567272  |
| 1 | -1.726541 | 2.711854  | 2.126573  |
| 6 | -1.667367 | 2.926136  | 0.000000  |
| 1 | -1.891547 | 3.998627  | 0.000000  |
| 1 | -2.639493 | 2.432985  | 0.000000  |
| 6 | -0.967916 | 2.603623  | -1.343532 |
| 1 | -0.235995 | 3.378439  | -1.567272 |
| 1 | -1.726541 | 2.711854  | -2.126573 |
| 6 | 2.018281  | 2.368932  | 1.330774  |
| 1 | 3.047266  | 2.011922  | 1.439089  |
| 1 | 1.871110  | 3.094186  | 2.140144  |
| 6 | 1.910803  | 3.145263  | 0.000000  |
| 1 | 2.718201  | 3.886221  | 0.000000  |
| 1 | 0.990861  | 3.728339  | 0.000000  |
| 6 | 2.018281  | 2.368932  | -1.330774 |
| 1 | 3.047266  | 2.011922  | -1.439089 |
| 1 | 1.871110  | 3.094186  | -2.140144 |
| 1 | 2.782140  | -0.131975 | 1.608698  |
| 1 | 2.782140  | -0.131975 | -1.608698 |

$[3_5](1,2,3,4,5) - C_s$       **(3b)**

|   |           |           |           |
|---|-----------|-----------|-----------|
| 6 | -1.653192 | 0.005645  | 1.640453  |
| 6 | -1.037116 | -1.234223 | 1.535564  |
| 6 | -0.960941 | 1.200724  | 1.545858  |
| 6 | -1.653192 | 0.005645  | -1.640453 |
| 6 | -0.960941 | 1.200724  | -1.545858 |
| 6 | -1.037116 | -1.234223 | -1.535564 |
| 6 | 1.094266  | -0.078710 | -1.482005 |
| 6 | 0.437744  | 1.164958  | -1.485933 |
| 6 | 0.362477  | -1.284974 | -1.475975 |
| 6 | 1.094266  | -0.078710 | 1.482005  |
| 6 | 0.362477  | -1.284974 | 1.475975  |
| 6 | 0.437744  | 1.164958  | 1.485933  |
| 6 | -1.786883 | 2.457010  | 1.342863  |
| 1 | -1.186074 | 3.359598  | 1.456605  |
| 1 | -2.544088 | 2.505903  | 2.133636  |
| 6 | -2.558004 | 2.491069  | 0.000000  |
| 1 | -3.177179 | 3.395221  | 0.000000  |
| 1 | -3.258116 | 1.648478  | 0.000000  |
| 6 | -1.786883 | 2.457010  | -1.342863 |
| 1 | -1.186074 | 3.359598  | -1.456605 |
| 1 | -2.544088 | 2.505903  | -2.133636 |
| 6 | 1.217597  | 2.461116  | 1.345351  |
| 1 | 0.879898  | 3.157186  | 2.121422  |
| 1 | 2.268350  | 2.287197  | 1.569297  |
| 6 | 1.095439  | 3.217037  | 0.000000  |
| 1 | 1.858125  | 4.003812  | 0.000000  |
| 1 | 0.142848  | 3.745659  | 0.000000  |
| 6 | 1.217597  | 2.461116  | -1.345351 |
| 1 | 2.268350  | 2.287197  | -1.569297 |
| 1 | 0.879898  | 3.157186  | -2.121422 |
| 6 | 2.609051  | -0.126293 | 1.350102  |
| 1 | 2.962692  | -1.127069 | 1.587832  |
| 1 | 3.053890  | 0.509794  | 2.122914  |
| 6 | 3.219094  | 0.332801  | 0.000000  |
| 1 | 4.270763  | 0.025308  | 0.000000  |
| 1 | 3.242111  | 1.422337  | 0.000000  |

|   |           |           |           |
|---|-----------|-----------|-----------|
| 6 | 2.609051  | -0.126293 | -1.350102 |
| 1 | 2.962692  | -1.127069 | -1.587832 |
| 1 | 3.053890  | 0.509794  | -2.122914 |
| 6 | 1.070879  | -2.622927 | 1.323245  |
| 1 | 0.354535  | -3.427555 | 1.477585  |
| 1 | 1.796882  | -2.740474 | 2.135830  |
| 6 | 1.815857  | -2.889928 | 0.000000  |
| 1 | 2.109256  | -3.945733 | 0.000000  |
| 1 | 2.752242  | -2.334709 | 0.000000  |
| 6 | 1.070879  | -2.622927 | -1.323245 |
| 1 | 0.354535  | -3.427555 | -1.477585 |
| 1 | 1.796882  | -2.740474 | -2.135830 |
| 6 | -1.966817 | -2.416779 | 1.318046  |
| 1 | -1.442083 | -3.371374 | 1.353444  |
| 1 | -2.692282 | -2.445354 | 2.138765  |
| 6 | -2.765955 | -2.344615 | 0.000000  |
| 6 | -1.966817 | -2.416779 | -1.318046 |
| 1 | -2.692282 | -2.445354 | -2.138765 |
| 1 | -1.442083 | -3.371374 | -1.353444 |
| 1 | -2.739886 | 0.041305  | 1.677124  |
| 1 | -2.739886 | 0.041305  | -1.677124 |
| 1 | -3.365806 | -1.428672 | 0.000000  |
| 1 | -3.481280 | -3.174771 | 0.000000  |

$[3_5](1,2,3,4,5) - C_s$       **(3c)**

|   |           |           |           |
|---|-----------|-----------|-----------|
| 6 | 1.603401  | 0.177007  | 1.639472  |
| 6 | 0.832769  | 1.323259  | 1.544008  |
| 6 | 1.064795  | -1.096280 | 1.543771  |
| 6 | 1.603401  | 0.177007  | -1.639472 |
| 6 | 1.064795  | -1.096280 | -1.543771 |
| 6 | 0.832769  | 1.323259  | -1.544008 |
| 6 | -1.141767 | -0.083999 | -1.474835 |
| 6 | -0.325524 | -1.234990 | -1.484586 |
| 6 | -0.563547 | 1.202914  | -1.478243 |
| 6 | -1.141767 | -0.083999 | 1.474835  |
| 6 | -0.563547 | 1.202914  | 1.478243  |
| 6 | -0.325524 | -1.234990 | 1.484586  |
| 6 | 2.042582  | -2.238374 | 1.341162  |
| 1 | 1.560276  | -3.209924 | 1.450178  |
| 1 | 2.797853  | -2.193215 | 2.134046  |
| 6 | 2.813783  | -2.172382 | 0.000000  |
| 1 | 3.543031  | -2.990312 | 0.000000  |
| 1 | 3.400987  | -1.247553 | 0.000000  |
| 6 | 2.042582  | -2.238374 | -1.341162 |
| 1 | 1.560276  | -3.209924 | -1.450178 |
| 1 | 2.797853  | -2.193215 | -2.134046 |
| 6 | -0.927711 | -2.623835 | 1.350448  |
| 1 | -0.484899 | -3.268631 | 2.117594  |
| 1 | -1.987082 | -2.594369 | 1.596685  |
| 6 | -0.724669 | -3.357175 | 0.000000  |
| 1 | -1.391104 | -4.226992 | 0.000000  |
| 1 | 0.282698  | -3.772575 | 0.000000  |
| 6 | -0.927711 | -2.623835 | -1.350448 |
| 1 | -1.987082 | -2.594369 | -1.596685 |
| 1 | -0.484899 | -3.268631 | -2.117594 |
| 6 | -2.648822 | -0.254854 | 1.328421  |
| 1 | -3.152593 | 0.693569  | 1.492515  |
| 1 | -3.014133 | -0.901839 | 2.133662  |
| 6 | -3.166837 | -0.845871 | 0.000000  |
| 1 | -4.256781 | -0.732767 | 0.000000  |

|   |           |           |           |
|---|-----------|-----------|-----------|
| 1 | -2.993406 | -1.919971 | 0.000000  |
| 6 | -2.648822 | -0.254854 | -1.328421 |
| 1 | -3.152593 | 0.693569  | -1.492515 |
| 1 | -3.014133 | -0.901839 | -2.133662 |
| 6 | -1.396437 | 2.468100  | 1.328804  |
| 1 | -1.118041 | 3.163245  | 2.128975  |
| 1 | -2.449279 | 2.259740  | 1.500417  |
| 6 | -1.268069 | 3.240415  | 0.000000  |
| 1 | -2.041137 | 4.017133  | 0.000000  |
| 1 | -0.323631 | 3.780427  | 0.000000  |
| 6 | -1.396437 | 2.468100  | -1.328804 |
| 1 | -1.118041 | 3.163245  | -2.128975 |
| 1 | -2.449279 | 2.259740  | -1.500417 |
| 6 | 1.586046  | 2.626281  | 1.347208  |
| 1 | 0.940159  | 3.493974  | 1.479393  |
| 1 | 2.346944  | 2.705179  | 2.131939  |
| 6 | 2.347675  | 2.714197  | 0.000000  |
| 6 | 1.586046  | 2.626281  | -1.347208 |
| 1 | 2.346944  | 2.705179  | -2.131939 |
| 1 | 0.940159  | 3.493974  | -1.479393 |
| 1 | 2.685849  | 0.281484  | 1.676061  |
| 1 | 2.685849  | 0.281484  | -1.676061 |
| 1 | 3.101840  | 1.919563  | 0.000000  |
| 1 | 2.906690  | 3.656777  | 0.000000  |

$[3_5](1,2,3,4,5) - C_{2V}$  (3d)

|   |           |           |           |
|---|-----------|-----------|-----------|
| 6 | 1.567789  | -0.000000 | -1.779525 |
| 6 | 1.505435  | 1.219015  | -1.121380 |
| 6 | 1.505435  | -1.219015 | -1.121380 |
| 6 | -1.567789 | 0.000000  | -1.779525 |
| 6 | -1.505435 | -1.219015 | -1.121380 |
| 6 | -1.505435 | 1.219015  | -1.121380 |
| 6 | -1.471106 | 0.000000  | 0.974885  |
| 6 | -1.473996 | -1.223827 | 0.279202  |
| 6 | -1.473996 | 1.223827  | 0.279202  |
| 6 | 1.471106  | -0.000000 | 0.974885  |
| 6 | 1.473996  | 1.223827  | 0.279202  |
| 6 | 1.473996  | -1.223827 | 0.279202  |
| 6 | 1.328057  | -2.461411 | -1.977471 |
| 1 | 2.141225  | -3.173603 | -1.792869 |
| 1 | 1.435584  | -2.156820 | -3.023240 |
| 6 | 0.000000  | -3.234839 | -1.830102 |
| 1 | 0.000000  | -3.767599 | -0.880005 |
| 1 | 0.000000  | -4.017277 | -2.597288 |
| 6 | -1.328057 | -2.461411 | -1.977471 |
| 1 | -2.141225 | -3.173603 | -1.792869 |
| 1 | -1.435584 | -2.156820 | -3.023240 |
| 6 | 1.346605  | -2.545745 | 1.014106  |
| 1 | 1.583630  | -3.354169 | 0.323729  |
| 1 | 2.121477  | -2.606842 | 1.786349  |
| 6 | 0.000000  | -2.844089 | 1.720719  |
| 1 | 0.000000  | -2.323286 | 2.674165  |
| 1 | 0.000000  | -3.908529 | 1.980092  |
| 6 | -1.346605 | -2.545745 | 1.014106  |
| 1 | -2.121477 | -2.606842 | 1.786349  |
| 1 | -1.583630 | -3.354169 | 0.323729  |
| 6 | 1.388758  | -0.000000 | 2.490981  |
| 1 | 1.945232  | 0.864236  | 2.858083  |
| 1 | 1.945232  | -0.864236 | 2.858083  |
| 6 | 0.000000  | 0.000000  | 3.228869  |

|   |           |           |           |
|---|-----------|-----------|-----------|
| 1 | 0.000000  | 0.857970  | 3.903197  |
| 1 | -0.000000 | -0.857970 | 3.903197  |
| 6 | -1.388758 | 0.000000  | 2.490981  |
| 1 | -1.945232 | 0.864236  | 2.858083  |
| 1 | -1.945232 | -0.864236 | 2.858083  |
| 6 | 1.346605  | 2.545745  | 1.014106  |
| 1 | 1.583630  | 3.354169  | 0.323729  |
| 1 | 2.121477  | 2.606842  | 1.786349  |
| 6 | 0.000000  | 2.844089  | 1.720719  |
| 1 | 0.000000  | 3.908529  | 1.980092  |
| 1 | 0.000000  | 2.323286  | 2.674165  |
| 6 | -1.346605 | 2.545745  | 1.014106  |
| 1 | -1.583630 | 3.354169  | 0.323729  |
| 1 | -2.121477 | 2.606842  | 1.786349  |
| 6 | 1.328057  | 2.461411  | -1.977471 |
| 1 | 1.435584  | 2.156820  | -3.023240 |
| 1 | 2.141225  | 3.173603  | -1.792869 |
| 6 | 0.000000  | 3.234839  | -1.830102 |
| 1 | 0.000000  | 4.017277  | -2.597288 |
| 1 | 0.000000  | 3.767599  | -0.880005 |
| 6 | -1.328057 | 2.461411  | -1.977471 |
| 1 | -1.435584 | 2.156820  | -3.023240 |
| 1 | -2.141225 | 3.173603  | -1.792869 |
| 1 | 1.552099  | -0.000000 | -2.866106 |
| 1 | -1.552099 | 0.000000  | -2.866106 |

$[3_4](1,2,3,5) - C_s$       **(4a)**

|   |           |           |           |
|---|-----------|-----------|-----------|
| 6 | 1.096853  | 1.050193  | 1.613828  |
| 6 | -0.108647 | 1.738784  | 1.570228  |
| 6 | 1.156888  | -0.335209 | 1.537775  |
| 6 | 1.096853  | 1.050193  | -1.613828 |
| 6 | 1.156888  | -0.335209 | -1.537775 |
| 6 | -0.108647 | 1.738784  | -1.570228 |
| 6 | -1.258652 | -0.407553 | -1.522196 |
| 6 | -0.031430 | -1.089397 | -1.486603 |
| 6 | -1.269347 | 0.985978  | -1.590416 |
| 6 | -1.258652 | -0.407553 | 1.522196  |
| 6 | -1.269347 | 0.985978  | 1.590416  |
| 6 | -0.031430 | -1.089397 | 1.486603  |
| 6 | 2.536058  | -0.939756 | 1.343087  |
| 1 | 2.522374  | -2.021696 | 1.473317  |
| 1 | 3.193087  | -0.558056 | 2.132588  |
| 6 | 3.208698  | -0.563567 | 0.000000  |
| 6 | 2.536058  | -0.939756 | -1.343087 |
| 1 | 2.522374  | -2.021696 | -1.473317 |
| 1 | 3.193087  | -0.558056 | -2.132588 |
| 6 | 0.029187  | -2.599087 | 1.325576  |
| 1 | 0.645635  | -3.013522 | 2.131709  |
| 1 | -0.960036 | -3.025466 | 1.484364  |
| 6 | 0.590701  | -3.149360 | 0.000000  |
| 6 | 0.029187  | -2.599087 | -1.325576 |
| 1 | -0.960036 | -3.025466 | -1.484364 |
| 1 | 0.645635  | -3.013522 | -2.131709 |
| 6 | -2.612067 | -1.067498 | 1.312539  |
| 1 | -3.270844 | -0.780568 | 2.139676  |
| 1 | -2.546746 | -2.154889 | 1.348614  |
| 6 | -3.311718 | -0.663809 | 0.000000  |
| 6 | -2.612067 | -1.067498 | -1.312539 |
| 1 | -3.270844 | -0.780568 | -2.139676 |
| 1 | -2.546746 | -2.154889 | -1.348614 |
| 6 | -0.141457 | 3.230666  | 1.323702  |



|   |           |           |           |
|---|-----------|-----------|-----------|
| 1 | 0.371095  | 3.755287  | 2.138242  |
| 1 | -1.180913 | 3.576465  | 1.337222  |
| 6 | 0.523747  | 3.669772  | 0.000000  |
| 6 | -0.141457 | 3.230666  | -1.323702 |
| 1 | 0.371095  | 3.755287  | -2.138242 |
| 1 | -1.180913 | 3.576465  | -1.337222 |
| 1 | 2.027993  | 1.612047  | 1.598409  |
| 1 | 2.027993  | 1.612047  | -1.598409 |
| 1 | -2.225611 | 1.501390  | 1.549691  |
| 1 | -2.225611 | 1.501390  | -1.549691 |
| 1 | 0.562720  | 4.764607  | 0.000000  |
| 1 | 1.566312  | 3.333109  | 0.000000  |
| 1 | 3.358654  | 0.521472  | 0.000000  |
| 1 | 4.212724  | -1.002504 | 0.000000  |
| 1 | 1.672537  | -3.030068 | 0.000000  |
| 1 | 0.422283  | -4.232172 | 0.000000  |
| 1 | -3.475900 | 0.418285  | 0.000000  |
| 1 | -4.308608 | -1.118387 | 0.000000  |

$[3_4](1,2,3,5) - C_s$  (4b)

|   |           |           |           |
|---|-----------|-----------|-----------|
| 6 | 1.320771  | 1.022810  | 1.558309  |
| 6 | 0.211416  | 1.851948  | 1.549464  |
| 6 | 1.212812  | -0.365092 | 1.500198  |
| 6 | 1.320771  | 1.022810  | -1.558309 |
| 6 | 1.212812  | -0.365092 | -1.500198 |
| 6 | 0.211416  | 1.851948  | -1.549464 |
| 6 | -1.195259 | -0.132113 | -1.505863 |
| 6 | -0.058324 | -0.960240 | -1.470147 |
| 6 | -1.038154 | 1.247577  | -1.578182 |
| 6 | -1.195259 | -0.132113 | 1.505863  |
| 6 | -1.038154 | 1.247577  | 1.578182  |
| 6 | -0.058324 | -0.960240 | 1.470147  |
| 6 | 2.501095  | -1.148656 | 1.326335  |
| 1 | 2.613257  | -1.877127 | 2.138613  |
| 1 | 3.332610  | -0.446278 | 1.440754  |
| 6 | 2.683449  | -1.915063 | 0.000000  |
| 1 | 2.035563  | -2.786949 | 0.000000  |
| 1 | 3.702798  | -2.316831 | 0.000000  |
| 6 | 2.501095  | -1.148656 | -1.326335 |
| 1 | 2.613257  | -1.877127 | -2.138613 |
| 1 | 3.332610  | -0.446278 | -1.440754 |
| 6 | -0.203726 | -2.467551 | 1.383682  |
| 1 | 0.624767  | -2.909261 | 1.942885  |
| 1 | -1.100342 | -2.743579 | 1.944122  |
| 6 | -0.275598 | -3.206800 | 0.000000  |
| 1 | -1.195241 | -3.795110 | 0.000000  |
| 1 | 0.513874  | -3.960820 | 0.000000  |
| 6 | -0.203726 | -2.467551 | -1.383682 |
| 1 | -1.100342 | -2.743579 | -1.944122 |
| 1 | 0.624767  | -2.909261 | -1.942885 |
| 6 | -2.608525 | -0.656961 | 1.328691  |
| 1 | -3.291767 | 0.190256  | 1.443737  |
| 1 | -2.859022 | -1.353256 | 2.138331  |
| 6 | -2.932026 | -1.372382 | 0.000000  |
| 1 | -4.009375 | -1.571965 | 0.000000  |
| 1 | -2.463931 | -2.352469 | 0.000000  |
| 6 | -2.608525 | -0.656961 | -1.328691 |
| 1 | -3.291767 | 0.190256  | -1.443737 |
| 1 | -2.859022 | -1.353256 | -2.138331 |
| 6 | 0.346877  | 3.340869  | 1.319893  |

|   |           |          |           |
|---|-----------|----------|-----------|
| 1 | 1.407749  | 3.613543 | 1.339166  |
| 1 | -0.129738 | 3.889773 | 2.140160  |
| 6 | -0.281507 | 3.837617 | 0.000000  |
| 1 | -0.229543 | 4.931935 | 0.000000  |
| 1 | -1.348130 | 3.588386 | 0.000000  |
| 6 | 0.346877  | 3.340869 | -1.319893 |
| 1 | 1.407749  | 3.613543 | -1.339166 |
| 1 | -0.129738 | 3.889773 | -2.140160 |
| 1 | 2.309832  | 1.470089 | 1.504283  |
| 1 | 2.309832  | 1.470089 | -1.504283 |
| 1 | -1.927217 | 1.872098 | 1.546840  |
| 1 | -1.927217 | 1.872098 | -1.546840 |

$[3_4](1,2,4,5) - D_{2h}$  (5a)

|   |           |           |           |
|---|-----------|-----------|-----------|
| 6 | 0.000000  | 1.351382  | 1.623608  |
| 6 | -1.227030 | 0.699972  | 1.537596  |
| 6 | 1.227030  | 0.699972  | 1.537596  |
| 6 | 0.000000  | 1.351382  | -1.623608 |
| 6 | 1.227030  | 0.699972  | -1.537596 |
| 6 | -1.227030 | 0.699972  | -1.537596 |
| 6 | -0.000000 | -1.351382 | -1.623608 |
| 6 | 1.227030  | -0.699972 | -1.537596 |
| 6 | -1.227030 | -0.699972 | -1.537596 |
| 6 | -0.000000 | -1.351382 | 1.623608  |
| 6 | -1.227030 | -0.699972 | 1.537596  |
| 6 | 1.227030  | -0.699972 | 1.537596  |
| 6 | 2.458296  | 1.556442  | 1.313187  |
| 1 | 3.369737  | 0.956746  | 1.343473  |
| 1 | 2.543671  | 2.271615  | 2.139088  |
| 6 | 2.436879  | 2.362806  | 0.000000  |
| 6 | 2.458296  | 1.556442  | -1.313187 |
| 1 | 3.369737  | 0.956746  | -1.343473 |
| 1 | 2.543671  | 2.271615  | -2.139088 |
| 6 | 2.458296  | -1.556442 | 1.313187  |
| 1 | 3.369737  | -0.956746 | 1.343473  |
| 1 | 2.543671  | -2.271615 | 2.139088  |
| 6 | 2.436879  | -2.362806 | -0.000000 |
| 6 | 2.458296  | -1.556442 | -1.313187 |
| 1 | 2.543671  | -2.271615 | -2.139088 |
| 1 | 3.369737  | -0.956746 | -1.343473 |
| 6 | -2.458296 | -1.556442 | 1.313187  |
| 1 | -3.369737 | -0.956746 | 1.343473  |
| 1 | -2.543671 | -2.271615 | 2.139088  |
| 6 | -2.436879 | -2.362806 | 0.000000  |
| 6 | -2.458296 | -1.556442 | -1.313187 |
| 1 | -3.369737 | -0.956746 | -1.343473 |
| 1 | -2.543671 | -2.271615 | -2.139088 |
| 6 | -2.458296 | 1.556442  | 1.313187  |
| 1 | -2.543671 | 2.271615  | 2.139088  |
| 1 | -3.369737 | 0.956746  | 1.343473  |
| 6 | -2.436879 | 2.362806  | -0.000000 |
| 6 | -2.458296 | 1.556442  | -1.313187 |
| 1 | -2.543671 | 2.271615  | -2.139088 |
| 1 | -3.369737 | 0.956746  | -1.343473 |
| 1 | 0.000000  | 2.439302  | 1.627830  |
| 1 | 0.000000  | 2.439302  | -1.627830 |
| 1 | -0.000000 | -2.439302 | 1.627830  |
| 1 | -0.000000 | -2.439302 | -1.627830 |
| 1 | -3.309694 | -3.025213 | 0.000000  |
| 1 | -1.559945 | -3.018810 | 0.000000  |

|   |           |           |          |
|---|-----------|-----------|----------|
| 1 | -3.309694 | 3.025213  | 0.000000 |
| 1 | -1.559945 | 3.018810  | 0.000000 |
| 1 | 1.559945  | 3.018810  | 0.000000 |
| 1 | 3.309694  | 3.025213  | 0.000000 |
| 1 | 1.559945  | -3.018810 | 0.000000 |
| 1 | 3.309694  | -3.025213 | 0.000000 |

$[3_4](1,2,4,5) - D_2$  (5b)

|   |           |           |           |
|---|-----------|-----------|-----------|
| 6 | -0.148075 | 1.337699  | 1.552915  |
| 6 | -1.302487 | 0.562268  | 1.500850  |
| 6 | 1.145805  | 0.829268  | 1.472748  |
| 6 | 0.148075  | 1.337699  | -1.552915 |
| 6 | 1.302487  | 0.562268  | -1.500850 |
| 6 | -1.145805 | 0.829268  | -1.472748 |
| 6 | -0.148075 | -1.337699 | -1.552915 |
| 6 | 1.145805  | -0.829268 | -1.472748 |
| 6 | -1.302487 | -0.562268 | -1.500850 |
| 6 | 0.148075  | -1.337699 | 1.552915  |
| 6 | -1.145805 | -0.829268 | 1.472748  |
| 6 | 1.302487  | -0.562268 | 1.500850  |
| 6 | 2.264665  | 1.826681  | 1.243235  |
| 1 | 2.906013  | 1.880401  | 2.132033  |
| 1 | 1.803055  | 2.814445  | 1.150750  |
| 6 | 3.202665  | 1.597654  | 0.040882  |
| 1 | 3.908175  | 0.818162  | 0.316355  |
| 1 | 3.815446  | 2.500200  | -0.054450 |
| 6 | 2.622782  | 1.302484  | -1.375926 |
| 1 | 3.399692  | 0.777233  | -1.941854 |
| 1 | 2.487258  | 2.261230  | -1.885141 |
| 6 | 2.622782  | -1.302484 | 1.375926  |
| 1 | 3.399692  | -0.777233 | 1.941854  |
| 1 | 2.487258  | -2.261230 | 1.885141  |
| 6 | 3.202665  | -1.597654 | -0.040882 |
| 1 | 3.815446  | -2.500200 | 0.054450  |
| 1 | 3.908175  | -0.818162 | -0.316355 |
| 6 | 2.264665  | -1.826681 | -1.243235 |
| 1 | 1.803055  | -2.814445 | -1.150750 |
| 1 | 2.906013  | -1.880401 | -2.132033 |
| 6 | -2.264665 | -1.826681 | 1.243235  |
| 1 | -2.906013 | -1.880401 | 2.132033  |
| 1 | -1.803055 | -2.814445 | 1.150750  |
| 6 | -3.202665 | -1.597654 | 0.040882  |
| 1 | -3.908175 | -0.818162 | 0.316355  |
| 1 | -3.815446 | -2.500200 | -0.054450 |
| 6 | -2.622782 | -1.302484 | -1.375926 |
| 1 | -3.399692 | -0.777233 | -1.941854 |
| 1 | -2.487258 | -2.261230 | -1.885141 |
| 6 | -2.622782 | 1.302484  | 1.375926  |
| 1 | -2.487258 | 2.261230  | 1.885141  |
| 1 | -3.399692 | 0.777233  | 1.941854  |
| 6 | -3.202665 | 1.597654  | -0.040882 |
| 1 | -3.815446 | 2.500200  | 0.054450  |
| 1 | -3.908175 | 0.818162  | -0.316355 |
| 6 | -2.264665 | 1.826681  | -1.243235 |
| 1 | -1.803055 | 2.814445  | -1.150750 |
| 1 | -2.906013 | 1.880401  | -2.132033 |
| 1 | -0.269248 | 2.418324  | 1.532468  |
| 1 | 0.269248  | 2.418324  | -1.532468 |
| 1 | 0.269248  | -2.418324 | 1.532468  |
| 1 | -0.269248 | -2.418324 | -1.532468 |

$[3_3](1,2,3) - C_{3h}$  (6a)

|   |           |           |           |
|---|-----------|-----------|-----------|
| 6 | 1.298587  | 0.468974  | 1.584210  |
| 6 | 0.240962  | 1.380668  | 1.558949  |
| 6 | 1.075213  | -0.899013 | 1.558949  |
| 6 | 1.298587  | 0.468974  | -1.584210 |
| 6 | 1.075213  | -0.899013 | -1.558949 |
| 6 | 0.240962  | 1.380668  | -1.558949 |
| 6 | -1.316175 | -0.481655 | -1.558949 |
| 6 | -0.243150 | -1.359096 | -1.584210 |
| 6 | -1.055436 | 0.890122  | -1.584210 |
| 6 | -1.316175 | -0.481655 | 1.558949  |
| 6 | -1.055436 | 0.890122  | 1.584210  |
| 6 | -0.243150 | -1.359096 | 1.584210  |
| 6 | 2.214496  | -1.866280 | 1.318427  |
| 1 | 2.263750  | -2.590737 | 2.139194  |
| 1 | 3.162180  | -1.316962 | 1.332609  |
| 6 | 2.110396  | -2.661774 | 0.000000  |
| 1 | 1.175344  | -3.231851 | 0.000000  |
| 1 | 2.913310  | -3.406676 | 0.000000  |
| 6 | 2.214496  | -1.866280 | -1.318427 |
| 1 | 2.263750  | -2.590737 | -2.139194 |
| 1 | 3.162180  | -1.316962 | -1.332609 |
| 6 | -2.723494 | -0.984670 | 1.318427  |
| 1 | -3.375519 | -0.665097 | 2.139194  |
| 1 | -2.721612 | -2.080048 | 1.332609  |
| 6 | -3.360362 | -0.496769 | 0.000000  |
| 1 | -3.386537 | 0.598047  | 0.000000  |
| 1 | -4.406923 | -0.819662 | 0.000000  |
| 6 | -2.723494 | -0.984670 | -1.318427 |
| 1 | -3.375519 | -0.665097 | -2.139194 |
| 1 | -2.721612 | -2.080048 | -1.332609 |
| 6 | 0.508998  | 2.850950  | 1.318427  |
| 1 | 1.111769  | 3.255834  | 2.139194  |
| 1 | -0.440568 | 3.397009  | 1.332609  |
| 6 | 1.249966  | 3.158543  | 0.000000  |
| 1 | 2.211193  | 2.633803  | 0.000000  |
| 1 | 1.493613  | 4.226338  | 0.000000  |
| 6 | 0.508998  | 2.850950  | -1.318427 |
| 1 | 1.111769  | 3.255834  | -2.139194 |
| 1 | -0.440568 | 3.397009  | -1.332609 |
| 1 | 2.318833  | 0.836782  | 1.511663  |
| 1 | 2.318833  | 0.836782  | -1.511663 |
| 1 | -1.884091 | 1.589778  | 1.511663  |
| 1 | -1.884091 | 1.589778  | -1.511663 |
| 1 | -0.434742 | -2.426559 | 1.511663  |
| 1 | -0.434742 | -2.426559 | -1.511663 |

$[3_3](1,2,3) - C_s$  (6b)

|   |           |           |           |
|---|-----------|-----------|-----------|
| 6 | 0.307896  | -1.280126 | 1.605841  |
| 6 | 1.301569  | -0.304510 | 1.566354  |
| 6 | -1.039731 | -0.942275 | 1.560444  |
| 6 | 0.307896  | -1.280126 | -1.605841 |
| 6 | -1.039731 | -0.942275 | -1.560444 |
| 6 | 1.301569  | -0.304510 | -1.566354 |
| 6 | -0.420923 | 1.405804  | -1.552141 |
| 6 | -1.386524 | 0.406460  | -1.565162 |
| 6 | 0.920728  | 1.031790  | -1.583794 |
| 6 | -0.420923 | 1.405804  | 1.552141  |

|   |           |           |           |
|---|-----------|-----------|-----------|
| 6 | 0.920728  | 1.031790  | 1.583794  |
| 6 | -1.386524 | 0.406460  | 1.565162  |
| 6 | -2.088288 | -2.006918 | 1.318408  |
| 1 | -3.081478 | -1.545019 | 1.331700  |
| 1 | -2.073726 | -2.732960 | 2.139159  |
| 6 | -1.911085 | -2.789293 | 0.000000  |
| 1 | -2.641145 | -3.605964 | 0.000000  |
| 1 | -0.926034 | -3.268393 | 0.000000  |
| 6 | -2.088288 | -2.006918 | -1.318408 |
| 1 | -3.081478 | -1.545019 | -1.331700 |
| 1 | -2.073726 | -2.732960 | -2.139159 |
| 6 | -0.807172 | 2.850109  | 1.315698  |
| 1 | -0.436832 | 3.470394  | 2.139790  |
| 1 | -1.899041 | 2.937332  | 1.329408  |
| 6 | -0.268807 | 3.448728  | 0.000000  |
| 1 | 0.824640  | 3.386825  | 0.000000  |
| 1 | -0.507604 | 4.517717  | 0.000000  |
| 6 | -0.807172 | 2.850109  | -1.315698 |
| 1 | -0.436832 | 3.470394  | -2.139790 |
| 1 | -1.899041 | 2.937332  | -1.329408 |
| 6 | 2.743819  | -0.693699 | 1.320740  |
| 1 | 3.100088  | -1.329984 | 2.138838  |
| 1 | 3.367887  | 0.206467  | 1.334277  |
| 6 | 2.983628  | -1.456788 | 0.000000  |
| 1 | 2.375252  | -2.367592 | 0.000000  |
| 1 | 4.025822  | -1.794026 | 0.000000  |
| 6 | 2.743819  | -0.693699 | -1.320740 |
| 1 | 3.100088  | -1.329984 | -2.138838 |
| 1 | 3.367887  | 0.206467  | -1.334277 |
| 1 | 0.593263  | -2.327965 | 1.555598  |
| 1 | 0.593263  | -2.327965 | -1.555598 |
| 1 | 1.688617  | 1.797542  | 1.510271  |
| 1 | 1.688617  | 1.797542  | -1.510271 |
| 1 | -2.433698 | 0.682162  | 1.471617  |
| 1 | -2.433698 | 0.682162  | -1.471617 |

## II) Ng@cyclophane endohedral complexes

He@[3<sub>6</sub>](1,2,3,4,5,6)

|   |           |           |           |
|---|-----------|-----------|-----------|
| 6 | 0.000000  | -1.409536 | 1.596801  |
| 6 | 1.220694  | -0.704768 | 1.596801  |
| 6 | -1.220694 | -0.704768 | 1.596801  |
| 6 | 0.000000  | -1.409536 | -1.596801 |
| 6 | -1.220694 | -0.704768 | -1.596801 |
| 6 | 1.220694  | -0.704768 | -1.596801 |
| 6 | 0.000000  | 1.409536  | -1.596801 |
| 6 | -1.220694 | 0.704768  | -1.596801 |
| 6 | 1.220694  | 0.704768  | -1.596801 |
| 6 | 0.000000  | 1.409536  | 1.596801  |
| 6 | 1.220694  | 0.704768  | 1.596801  |
| 6 | -1.220694 | 0.704768  | 1.596801  |
| 6 | -0.468319 | -3.472247 | 0.000000  |
| 1 | -1.556696 | -3.448924 | 0.000000  |
| 1 | -0.211239 | -4.537955 | 0.000000  |
| 6 | 0.009690  | -2.916641 | 1.375520  |
| 1 | 1.000643  | -3.307656 | 1.593858  |
| 1 | -0.635612 | -3.392174 | 2.122372  |
| 6 | 0.009690  | -2.916641 | -1.375520 |
| 1 | -0.635612 | -3.392174 | -2.122372 |

|   |           |           |           |
|---|-----------|-----------|-----------|
| 1 | 1.000643  | -3.307656 | -1.593858 |
| 6 | -2.521040 | -1.466712 | 1.375520  |
| 1 | -3.255514 | -1.145631 | 2.122372  |
| 1 | -2.364193 | -2.520410 | 1.593858  |
| 6 | -3.241213 | -1.330547 | 0.000000  |
| 1 | -3.765204 | -0.376324 | 0.000000  |
| 1 | -4.035604 | -2.086039 | 0.000000  |
| 6 | -2.521040 | -1.466712 | -1.375520 |
| 1 | -3.255514 | -1.145631 | -2.122372 |
| 1 | -2.364193 | -2.520410 | -1.593858 |
| 6 | -2.530730 | 1.449928  | 1.375520  |
| 1 | -3.364835 | 0.787246  | 1.593858  |
| 1 | -2.619903 | 2.246543  | 2.122372  |
| 6 | -2.772894 | 2.141700  | 0.000000  |
| 1 | -2.208508 | 3.072601  | 0.000000  |
| 1 | -3.824365 | 2.451916  | 0.000000  |
| 6 | -2.530730 | 1.449928  | -1.375520 |
| 1 | -2.619903 | 2.246543  | -2.122372 |
| 1 | -3.364835 | 0.787246  | -1.593858 |
| 6 | -0.009690 | 2.916641  | 1.375520  |
| 1 | 0.635612  | 3.392174  | 2.122372  |
| 1 | -1.000643 | 3.307656  | 1.593858  |
| 6 | 0.468319  | 3.472247  | 0.000000  |
| 1 | 1.556696  | 3.448924  | 0.000000  |
| 1 | 0.211239  | 4.537955  | 0.000000  |
| 6 | -0.009690 | 2.916641  | -1.375520 |
| 1 | 0.635612  | 3.392174  | -2.122372 |
| 1 | -1.000643 | 3.307656  | -1.593858 |
| 6 | 2.521040  | 1.466712  | 1.375520  |
| 1 | 3.255514  | 1.145631  | 2.122372  |
| 1 | 2.364193  | 2.520410  | 1.593858  |
| 6 | 3.241213  | 1.330547  | 0.000000  |
| 1 | 3.765204  | 0.376324  | 0.000000  |
| 1 | 4.035604  | 2.086039  | 0.000000  |
| 6 | 2.521040  | 1.466712  | -1.375520 |
| 1 | 3.255514  | 1.145631  | -2.122372 |
| 1 | 2.364193  | 2.520410  | -1.593858 |
| 6 | 2.530730  | -1.449928 | 1.375520  |
| 1 | 2.619903  | -2.246543 | 2.122372  |
| 1 | 3.364835  | -0.787246 | 1.593858  |
| 6 | 2.772894  | -2.141700 | 0.000000  |
| 1 | 2.208508  | -3.072601 | 0.000000  |
| 1 | 3.824365  | -2.451916 | 0.000000  |
| 6 | 2.530730  | -1.449928 | -1.375520 |
| 1 | 2.619903  | -2.246543 | -2.122372 |
| 1 | 3.364835  | -0.787246 | -1.593858 |
| 2 | 0.000000  | 0.000000  | 0.000000  |

Ne@[3<sub>6</sub>](1,2,3,4,5,6)

|   |           |           |           |
|---|-----------|-----------|-----------|
| 6 | -0.000000 | -1.416009 | 1.780171  |
| 6 | 1.226300  | -0.708005 | 1.780171  |
| 6 | -1.226300 | -0.708005 | 1.780171  |
| 6 | -0.000000 | -1.416009 | -1.780171 |
| 6 | -1.226300 | -0.708005 | -1.780171 |
| 6 | 1.226300  | -0.708005 | -1.780171 |
| 6 | 0.000000  | 1.416009  | -1.780171 |
| 6 | -1.226300 | 0.708005  | -1.780171 |
| 6 | 1.226300  | 0.708005  | -1.780171 |
| 6 | 0.000000  | 1.416009  | 1.780171  |
| 6 | 1.226300  | 0.708005  | 1.780171  |

|    |           |           |           |
|----|-----------|-----------|-----------|
| 6  | -1.226300 | 0.708005  | 1.780171  |
| 6  | -0.464328 | -3.388092 | 0.000000  |
| 1  | -1.549345 | -3.332084 | 0.000000  |
| 1  | -0.245505 | -4.462771 | 0.000000  |
| 6  | 0.010698  | -2.900617 | 1.419327  |
| 1  | 0.995325  | -3.313252 | 1.626406  |
| 1  | -0.649377 | -3.434864 | 2.111838  |
| 6  | 0.010698  | -2.900617 | -1.419327 |
| 1  | -0.649377 | -3.434864 | -2.111838 |
| 1  | 0.995325  | -3.313252 | -1.626406 |
| 6  | -2.506660 | -1.459573 | 1.419327  |
| 1  | -3.299368 | -1.155055 | 2.111838  |
| 1  | -2.371698 | -2.518603 | 1.626406  |
| 6  | -3.166338 | -1.291927 | 0.000000  |
| 1  | -3.660342 | -0.324270 | 0.000000  |
| 1  | -3.987626 | -2.018772 | 0.000000  |
| 6  | -2.506660 | -1.459573 | -1.419327 |
| 1  | -3.299368 | -1.155055 | -2.111838 |
| 1  | -2.371698 | -2.518603 | -1.626406 |
| 6  | -2.517357 | 1.441044  | 1.419327  |
| 1  | -3.367023 | 0.794649  | 1.626406  |
| 1  | -2.649991 | 2.279809  | 2.111838  |
| 6  | -2.702010 | 2.096165  | 0.000000  |
| 1  | -2.110997 | 3.007814  | 0.000000  |
| 1  | -3.742121 | 2.443999  | 0.000000  |
| 6  | -2.517357 | 1.441044  | -1.419327 |
| 1  | -2.649991 | 2.279809  | -2.111838 |
| 1  | -3.367023 | 0.794649  | -1.626406 |
| 6  | -0.010698 | 2.900617  | 1.419327  |
| 1  | 0.649377  | 3.434864  | 2.111838  |
| 1  | -0.995325 | 3.313252  | 1.626406  |
| 6  | 0.464328  | 3.388092  | 0.000000  |
| 1  | 1.549345  | 3.332084  | 0.000000  |
| 1  | 0.245505  | 4.462771  | 0.000000  |
| 6  | -0.010698 | 2.900617  | -1.419327 |
| 1  | 0.649377  | 3.434864  | -2.111838 |
| 1  | -0.995325 | 3.313252  | -1.626406 |
| 6  | 2.506660  | 1.459573  | 1.419327  |
| 1  | 3.299368  | 1.155055  | 2.111838  |
| 1  | 2.371698  | 2.518603  | 1.626406  |
| 6  | 3.166338  | 1.291927  | 0.000000  |
| 1  | 3.660342  | 0.324270  | 0.000000  |
| 1  | 3.987626  | 2.018772  | 0.000000  |
| 6  | 2.506660  | 1.459573  | -1.419327 |
| 1  | 3.299368  | 1.155055  | -2.111838 |
| 1  | 2.371698  | 2.518603  | -1.626406 |
| 6  | 2.517357  | -1.441044 | 1.419327  |
| 1  | 2.649991  | -2.279809 | 2.111838  |
| 1  | 3.367023  | -0.794649 | 1.626406  |
| 6  | 2.702010  | -2.096165 | 0.000000  |
| 1  | 2.110997  | -3.007814 | 0.000000  |
| 1  | 3.742121  | -2.443999 | 0.000000  |
| 6  | 2.517357  | -1.441044 | -1.419327 |
| 1  | 2.649991  | -2.279809 | -2.111838 |
| 1  | 3.367023  | -0.794649 | -1.626406 |
| 10 | 0.000000  | 0.000000  | 0.000000  |

Ar@[3<sub>6</sub>](1,2,3,4,5,6)

|   |           |           |          |
|---|-----------|-----------|----------|
| 6 | -1.250458 | -0.699762 | 1.981982 |
| 6 | -0.028383 | -1.420398 | 2.034641 |

|   |           |           |           |
|---|-----------|-----------|-----------|
| 6 | -1.240706 | 0.717388  | 1.977243  |
| 6 | -1.251140 | -0.700243 | -1.981434 |
| 6 | -1.241389 | 0.717015  | -1.976966 |
| 6 | -0.029379 | -1.420879 | -2.034395 |
| 6 | 1.218319  | 0.705126  | -2.079158 |
| 6 | -0.010371 | 1.420768  | -2.025057 |
| 6 | 1.209321  | -0.721038 | -2.084271 |
| 6 | 1.219078  | 0.705656  | 2.078794  |
| 6 | 1.210123  | -0.720649 | 2.084206  |
| 6 | -0.009437 | 1.421192  | 2.024770  |
| 6 | -3.094574 | -1.231323 | 0.000598  |
| 1 | -3.567053 | -0.255836 | 0.000594  |
| 1 | -3.935191 | -1.935973 | 0.000845  |
| 6 | -2.499280 | -1.427954 | 1.466039  |
| 1 | -2.394348 | -2.492212 | 1.661577  |
| 1 | -3.345044 | -1.131086 | 2.096100  |
| 6 | -2.499857 | -1.428236 | -1.465018 |
| 1 | -3.345787 | -1.131425 | -2.094880 |
| 1 | -2.395014 | -2.492548 | -1.660425 |
| 6 | -2.491974 | 1.441494  | 1.463179  |
| 1 | -2.657586 | 2.319439  | 2.097001  |
| 1 | -3.362496 | 0.818418  | 1.653707  |
| 6 | -2.615411 | 2.059046  | 0.000234  |
| 1 | -2.000943 | 2.951907  | -0.000037 |
| 1 | -3.643770 | 2.440669  | 0.000361  |
| 6 | -2.492524 | 1.441126  | -1.462587 |
| 1 | -2.658487 | 2.318877  | -2.096587 |
| 1 | -3.363091 | 0.817952  | -1.652608 |
| 6 | -0.004172 | 2.859479  | 1.481251  |
| 1 | -0.976340 | 3.308760  | 1.669694  |
| 1 | 0.680689  | 3.453890  | 2.094722  |
| 6 | 0.461633  | 3.256285  | -0.000471 |
| 1 | 1.541754  | 3.171155  | -0.000823 |
| 1 | 0.277791  | 4.337447  | -0.000570 |
| 6 | -0.005140 | 2.859134  | -1.481776 |
| 1 | 0.678930  | 3.453759  | -2.095901 |
| 1 | -0.977685 | 3.307971  | -1.669434 |
| 6 | 2.460483  | 1.421369  | 1.503959  |
| 1 | 3.332915  | 1.124962  | 2.094586  |
| 1 | 2.368607  | 2.487899  | 1.693953  |
| 6 | 3.017928  | 1.219939  | -0.000565 |
| 1 | 3.492196  | 0.246090  | -0.000551 |
| 1 | 3.856227  | 1.926781  | -0.000777 |
| 6 | 2.459940  | 1.421027  | -1.504898 |
| 1 | 3.332166  | 1.124566  | -2.095787 |
| 1 | 2.367969  | 2.487512  | -1.695089 |
| 6 | 2.454953  | -1.429772 | 1.506520  |
| 1 | 2.637129  | -2.335228 | 2.094053  |
| 1 | 3.330863  | -0.815461 | 1.698779  |
| 6 | 2.562527  | -2.010281 | -0.000183 |
| 1 | 1.962153  | -2.911860 | 0.000234  |
| 1 | 3.595945  | -2.376858 | -0.000253 |
| 6 | 2.454216  | -1.430457 | -1.506993 |
| 1 | 2.635698  | -2.336213 | -2.094283 |
| 1 | 3.330258  | -0.816608 | -1.700114 |
| 6 | -0.016784 | -2.858160 | 1.485695  |
| 1 | -0.703371 | -3.457661 | 2.093055  |
| 1 | 0.955322  | -3.303924 | 1.680066  |
| 6 | -0.475471 | -3.255815 | 0.000294  |
| 1 | -1.555949 | -3.178605 | 0.000780  |
| 1 | -0.284799 | -4.335807 | 0.000477  |
| 6 | -0.017961 | -2.858626 | -1.485455 |
| 1 | -0.705457 | -3.457766 | -2.092170 |



|    |          |           |           |
|----|----------|-----------|-----------|
| 1  | 0.953678 | -3.304952 | -1.680817 |
| 18 | 0.212081 | -0.019041 | -0.000030 |

Kr@[3<sub>6</sub>](1,2,3,4,5,6)

|   |           |           |           |
|---|-----------|-----------|-----------|
| 6 | 1.322145  | -0.535764 | 2.117016  |
| 6 | 1.127748  | 0.874744  | 2.113859  |
| 6 | 0.196948  | -1.409223 | 2.122191  |
| 6 | 1.321806  | -0.535742 | -2.116928 |
| 6 | 0.196787  | -1.409996 | -2.121956 |
| 6 | 1.127322  | 0.874936  | -2.114305 |
| 6 | -1.317125 | 0.539540  | -2.122955 |
| 6 | -1.123020 | -0.872375 | -2.124637 |
| 6 | -0.191650 | 1.412656  | -2.116927 |
| 6 | -1.316757 | 0.540148  | 2.122853  |
| 6 | -0.191052 | 1.412720  | 2.116914  |
| 6 | -1.122835 | -0.871414 | 2.124681  |
| 6 | 2.817443  | -1.617501 | -0.000238 |
| 1 | 2.345315  | -2.591595 | -0.000295 |
| 1 | 3.891103  | -1.840600 | -0.000252 |
| 6 | 2.641143  | -1.059670 | 1.509337  |
| 1 | 3.425017  | -0.329920 | 1.695192  |
| 1 | 2.955826  | -1.933048 | 2.089302  |
| 6 | 2.641094  | -1.059369 | -1.509670 |
| 1 | 2.955778  | -1.932479 | -2.090020 |
| 1 | 3.424669  | -0.329300 | -1.695457 |
| 6 | 0.402473  | -2.813040 | 1.512098  |
| 1 | -0.197138 | -3.523337 | 2.089973  |
| 1 | 1.426452  | -3.127198 | 1.697453  |
| 6 | 0.007144  | -3.242201 | 0.000521  |
| 1 | -1.072712 | -3.317409 | 0.000447  |
| 1 | 0.348292  | -4.284363 | 0.000655  |
| 6 | 0.402765  | -2.813518 | -1.511114 |
| 1 | -0.196310 | -3.524262 | -2.089012 |
| 1 | 1.426982  | -3.127200 | -1.696036 |
| 6 | -2.235962 | -1.751989 | 1.513680  |
| 1 | -1.997364 | -2.795864 | 1.700723  |
| 1 | -3.151528 | -1.586067 | 2.090018  |
| 6 | -2.804608 | -1.626508 | 0.000169  |
| 1 | -3.413006 | -0.731088 | -0.000044 |
| 1 | -3.533651 | -2.445654 | 0.000471  |
| 6 | -2.235749 | -1.753096 | -1.513162 |
| 1 | -3.151295 | -1.588672 | -2.089951 |
| 1 | -1.996036 | -2.796945 | -1.698988 |
| 6 | -2.636224 | 1.062703  | 1.512060  |
| 1 | -2.951440 | 1.937198  | 2.089926  |
| 1 | -3.419859 | 0.332940  | 1.698315  |
| 6 | -2.811915 | 1.618464  | -0.000211 |
| 1 | -2.341707 | 2.593528  | -0.000568 |
| 1 | -3.885982 | 1.839786  | -0.000208 |
| 6 | -2.636674 | 1.061785  | -1.512075 |
| 1 | -2.952940 | 1.935523  | -2.090507 |
| 1 | -3.419801 | 0.331219  | -1.697452 |
| 6 | -0.398667 | 2.817182  | 1.509503  |
| 1 | 0.199681  | 3.526681  | 2.089828  |
| 1 | -1.423024 | 3.129475  | 1.695443  |
| 6 | -0.002826 | 3.248229  | 0.000003  |
| 1 | 1.077106  | 3.322432  | -0.000132 |
| 1 | -0.343266 | 4.290648  | 0.000150  |
| 6 | -0.399213 | 2.817131  | -1.509338 |
| 1 | 0.198861  | 3.526573  | -2.089965 |

|    |           |           |           |
|----|-----------|-----------|-----------|
| 1  | -1.423661 | 3.129385  | -1.694815 |
| 6  | 2.241291  | 1.755902  | 1.508409  |
| 1  | 3.154234  | 1.590316  | 2.089255  |
| 1  | 2.001356  | 2.799525  | 1.694958  |
| 6  | 2.813529  | 1.629136  | -0.000230 |
| 1  | 3.419329  | 0.731883  | -0.000395 |
| 1  | 3.545286  | 2.445930  | -0.000393 |
| 6  | 2.241020  | 1.756119  | -1.508774 |
| 1  | 3.153785  | 1.590791  | -2.090032 |
| 1  | 2.000570  | 2.799707  | -1.694915 |
| 36 | -0.014922 | -0.009680 | -0.000203 |

## He@[3<sub>5</sub>](1,2,3,4,5) – He@3a

|   |           |           |           |
|---|-----------|-----------|-----------|
| 6 | 1.676574  | -0.066742 | 1.869588  |
| 6 | 1.082107  | 1.178524  | 1.687563  |
| 6 | 0.970021  | -1.258657 | 1.720088  |
| 6 | 1.676574  | -0.066742 | -1.869588 |
| 6 | 0.970021  | -1.258657 | -1.720088 |
| 6 | 1.082107  | 1.178524  | -1.687563 |
| 6 | -1.071047 | 0.048950  | -1.568683 |
| 6 | -0.426261 | -1.207452 | -1.595214 |
| 6 | -0.319691 | 1.242765  | -1.577279 |
| 6 | -1.071047 | 0.048950  | 1.568683  |
| 6 | -0.319691 | 1.242765  | 1.577279  |
| 6 | -0.426261 | -1.207452 | 1.595214  |
| 6 | 1.790794  | -2.492244 | 1.382378  |
| 1 | 1.206965  | -3.408744 | 1.475458  |
| 1 | 2.595960  | -2.581564 | 2.120631  |
| 6 | 2.517793  | -2.443085 | 0.000000  |
| 1 | 3.214290  | -3.289658 | 0.000000  |
| 1 | 3.143024  | -1.543658 | 0.000000  |
| 6 | 1.790794  | -2.492244 | -1.382378 |
| 1 | 1.206965  | -3.408744 | -1.475458 |
| 1 | 2.595960  | -2.581564 | -2.120631 |
| 6 | -1.210929 | -2.488686 | 1.364723  |
| 1 | -0.899169 | -3.220860 | 2.118317  |
| 1 | -2.265842 | -2.315907 | 1.571614  |
| 6 | -1.062225 | -3.213087 | 0.000000  |
| 1 | -1.800119 | -4.023910 | 0.000000  |
| 1 | -0.095796 | -3.713679 | 0.000000  |
| 6 | -1.210929 | -2.488686 | -1.364723 |
| 1 | -2.265842 | -2.315907 | -1.571614 |
| 1 | -0.899169 | -3.220860 | -2.118317 |
| 6 | -2.577051 | 0.121253  | 1.361420  |
| 1 | -2.921189 | 1.131501  | 1.573771  |
| 1 | -3.065681 | -0.497317 | 2.122683  |
| 6 | -3.160596 | -0.344509 | 0.000000  |
| 1 | -4.217015 | -0.052198 | 0.000000  |
| 1 | -3.171506 | -1.433127 | 0.000000  |
| 6 | -2.577051 | 0.121253  | -1.361420 |
| 1 | -2.921189 | 1.131501  | -1.573771 |
| 1 | -3.065681 | -0.497317 | -2.122683 |
| 6 | -0.985803 | 2.592878  | 1.359168  |
| 1 | -0.260293 | 3.377008  | 1.571567  |
| 1 | -1.759834 | 2.728893  | 2.123494  |
| 6 | -1.676958 | 2.880086  | 0.000000  |
| 1 | -1.930254 | 3.946575  | 0.000000  |
| 1 | -2.636559 | 2.365103  | 0.000000  |
| 6 | -0.985803 | 2.592878  | -1.359168 |
| 1 | -0.260293 | 3.377008  | -1.571567 |

|   |           |           |           |
|---|-----------|-----------|-----------|
| 1 | -1.759834 | 2.728893  | -2.123494 |
| 6 | 2.005150  | 2.348509  | 1.370862  |
| 1 | 3.033509  | 1.986402  | 1.465430  |
| 1 | 1.900681  | 3.135258  | 2.128700  |
| 6 | 1.867247  | 3.071873  | 0.000000  |
| 1 | 2.655902  | 3.833618  | 0.000000  |
| 1 | 0.938906  | 3.638628  | 0.000000  |
| 6 | 2.005150  | 2.348509  | -1.370862 |
| 1 | 3.033509  | 1.986402  | -1.465430 |
| 1 | 1.900681  | 3.135258  | -2.128700 |
| 1 | 2.761692  | -0.118180 | 1.920932  |
| 1 | 2.761692  | -0.118180 | -1.920932 |
| 2 | 0.563796  | -0.048755 | 0.000000  |

# He@[3<sub>4</sub>](1,2,3,5) – (He@4a)

|   |           |           |           |
|---|-----------|-----------|-----------|
| 6 | 1.078895  | 1.051594  | 1.854449  |
| 6 | -0.139001 | 1.725869  | 1.778966  |
| 6 | 1.162617  | -0.329934 | 1.694212  |
| 6 | 1.078895  | 1.051594  | -1.854449 |
| 6 | 1.162617  | -0.329934 | -1.694212 |
| 6 | -0.139001 | 1.725869  | -1.778966 |
| 6 | -1.257513 | -0.439465 | -1.650203 |
| 6 | -0.016182 | -1.100477 | -1.588613 |
| 6 | -1.291840 | 0.952890  | -1.783650 |
| 6 | -1.257513 | -0.439465 | 1.650203  |
| 6 | -1.291840 | 0.952890  | 1.783650  |
| 6 | -0.016182 | -1.100477 | 1.588613  |
| 6 | 2.542083  | -0.882974 | 1.374553  |
| 1 | 2.579413  | -1.967398 | 1.479919  |
| 1 | 3.243078  | -0.494273 | 2.121769  |
| 6 | 3.129855  | -0.441583 | 0.000000  |
| 6 | 2.542083  | -0.882974 | -1.374553 |
| 1 | 2.579413  | -1.967398 | -1.479919 |
| 1 | 3.243078  | -0.494273 | -2.121769 |
| 6 | 0.066703  | -2.597385 | 1.336762  |
| 1 | 0.682031  | -3.042509 | 2.127766  |
| 1 | -0.917958 | -3.044063 | 1.467382  |
| 6 | 0.652026  | -3.096483 | 0.000000  |
| 6 | 0.066703  | -2.597385 | -1.336762 |
| 1 | -0.917958 | -3.044063 | -1.467382 |
| 1 | 0.682031  | -3.042509 | -2.127766 |
| 6 | -2.590151 | -1.101639 | 1.332965  |
| 1 | -3.297778 | -0.843812 | 2.128811  |
| 1 | -2.520747 | -2.189526 | 1.342015  |
| 6 | -3.240478 | -0.661749 | 0.000000  |
| 6 | -2.590151 | -1.101639 | -1.332965 |
| 1 | -3.297778 | -0.843812 | -2.128811 |
| 1 | -2.520747 | -2.189526 | -1.342015 |
| 6 | -0.183512 | 3.185961  | 1.368176  |
| 1 | 0.332906  | 3.799757  | 2.115310  |
| 1 | -1.223890 | 3.528248  | 1.352181  |
| 6 | 0.492312  | 3.518228  | 0.000000  |
| 6 | -0.183512 | 3.185961  | -1.368176 |
| 1 | 0.332906  | 3.799757  | -2.115310 |
| 1 | -1.223890 | 3.528248  | -1.352181 |
| 1 | 2.001499  | 1.628097  | 1.847807  |
| 1 | 2.001499  | 1.628097  | -1.847807 |
| 1 | -2.254251 | 1.454490  | 1.718915  |
| 1 | -2.254251 | 1.454490  | -1.718915 |
| 1 | 0.638070  | 4.604077  | 0.000000  |

|   |           |           |          |
|---|-----------|-----------|----------|
| 1 | 1.498685  | 3.086251  | 0.000000 |
| 1 | 3.155543  | 0.653540  | 0.000000 |
| 1 | 4.177895  | -0.762877 | 0.000000 |
| 1 | 1.724848  | -2.921450 | 0.000000 |
| 1 | 0.542532  | -4.187327 | 0.000000 |
| 1 | -3.345301 | 0.427608  | 0.000000 |
| 1 | -4.261534 | -1.060034 | 0.000000 |
| 2 | -0.023407 | 0.509207  | 0.000000 |

## He@[3<sub>4</sub>](1,2,4,5) – (He@5a)

|   |           |           |           |
|---|-----------|-----------|-----------|
| 6 | 0.000078  | 1.353252  | 1.826828  |
| 6 | -1.227803 | 0.701069  | 1.695857  |
| 6 | 1.227808  | 0.700759  | 1.696008  |
| 6 | -0.000068 | 1.354949  | -1.826073 |
| 6 | 1.227883  | 0.702707  | -1.695822 |
| 6 | -1.227743 | 0.702345  | -1.695423 |
| 6 | 0.000314  | -1.353205 | -1.827124 |
| 6 | 1.228047  | -0.700696 | -1.696149 |
| 6 | -1.227577 | -0.701069 | -1.696151 |
| 6 | -0.000270 | -1.354896 | 1.826140  |
| 6 | -1.227974 | -0.702321 | 1.695434  |
| 6 | 1.227649  | -0.702653 | 1.695756  |
| 6 | 2.433425  | 1.552690  | 1.341020  |
| 1 | 3.351927  | 0.962802  | 1.341118  |
| 1 | 2.565602  | 2.306846  | 2.125261  |
| 6 | 2.331495  | 2.324368  | 0.001180  |
| 6 | 2.433087  | 1.554875  | -1.339952 |
| 1 | 3.352075  | 0.965740  | -1.341737 |
| 1 | 2.564179  | 2.310469  | -2.122996 |
| 6 | 2.432883  | -1.554892 | 1.340267  |
| 1 | 3.351953  | -0.965888 | 1.342327  |
| 1 | 2.563636  | -2.310589 | 2.123262  |
| 6 | 2.331367  | -2.324287 | -0.000966 |
| 6 | 2.433533  | -1.552701 | -1.340855 |
| 1 | 2.565690  | -2.306975 | -2.124988 |
| 1 | 3.352117  | -0.962936 | -1.340974 |
| 6 | -2.433432 | -1.554122 | 1.339677  |
| 1 | -3.352144 | -0.964532 | 1.340715  |
| 1 | -2.565160 | -2.309232 | 2.123072  |
| 6 | -2.331462 | -2.324315 | -0.001043 |
| 6 | -2.432968 | -1.553382 | -1.341349 |
| 1 | -3.351792 | -0.963985 | -1.342435 |
| 1 | -2.564238 | -2.308045 | -2.125256 |
| 6 | -2.433259 | 1.553287  | 1.341130  |
| 1 | -2.564735 | 2.307780  | 2.125165  |
| 1 | -3.351988 | 0.963727  | 1.341964  |
| 6 | -2.331690 | 2.324373  | 0.000927  |
| 6 | -2.433314 | 1.554090  | -1.339751 |
| 1 | -2.565114 | 2.309072  | -2.123257 |
| 1 | -3.351936 | 0.964381  | -1.340774 |
| 1 | 0.000190  | 2.441300  | 1.825646  |
| 1 | -0.000210 | 2.442994  | -1.822536 |
| 1 | -0.000408 | -2.442950 | 1.824017  |
| 1 | 0.000483  | -2.441257 | -1.825650 |
| 1 | -3.145287 | -3.058370 | -0.001377 |
| 1 | -1.403725 | -2.905848 | -0.001017 |
| 1 | -3.145652 | 3.058279  | 0.001145  |
| 1 | -1.404079 | 2.906097  | 0.001121  |
| 1 | 1.403777  | 2.905920  | 0.001763  |
| 1 | 3.145329  | 3.058416  | 0.001594  |
| 1 | 1.403553  | -2.905698 | -0.001587 |

|   |          |           |           |
|---|----------|-----------|-----------|
| 1 | 3.145093 | -3.058453 | -0.001345 |
| 2 | 0.000404 | -0.000209 | 0.000186  |

# Ar@[3<sub>4</sub>](1,2,4,5) – (Ar@5a)

|    |           |           |           |
|----|-----------|-----------|-----------|
| 6  | -2.349032 | 0.000000  | 1.360787  |
| 6  | -2.118572 | 1.223564  | 0.704751  |
| 6  | -2.118572 | -1.223564 | 0.704751  |
| 6  | 2.349032  | -0.000000 | 1.360787  |
| 6  | 2.118572  | -1.223564 | 0.704751  |
| 6  | 2.118572  | 1.223564  | 0.704751  |
| 6  | 2.348389  | -0.000000 | -1.361060 |
| 6  | 2.118387  | -1.223578 | -0.704969 |
| 6  | 2.118387  | 1.223578  | -0.704969 |
| 6  | -2.348389 | 0.000000  | -1.361060 |
| 6  | -2.118387 | 1.223578  | -0.704969 |
| 6  | -2.118387 | -1.223578 | -0.704969 |
| 6  | -1.426913 | -2.320676 | 1.528038  |
| 1  | -1.382086 | -3.260373 | 0.974667  |
| 1  | -2.067229 | -2.524403 | 2.392790  |
| 6  | 0.000000  | -2.031768 | 2.169860  |
| 6  | 1.426913  | -2.320676 | 1.528038  |
| 1  | 1.382086  | -3.260373 | 0.974667  |
| 1  | 2.067229  | -2.524403 | 2.392790  |
| 6  | -1.426581 | -2.320724 | -1.528216 |
| 1  | -1.381208 | -3.260140 | -0.974444 |
| 1  | -2.067229 | -2.524987 | -2.392600 |
| 6  | 0.000000  | -2.031404 | -2.170217 |
| 6  | 1.426581  | -2.320724 | -1.528216 |
| 1  | 2.067229  | -2.524987 | -2.392600 |
| 1  | 1.381208  | -3.260140 | -0.974444 |
| 6  | -1.426581 | 2.320724  | -1.528216 |
| 1  | -1.381208 | 3.260140  | -0.974444 |
| 1  | -2.067229 | 2.524987  | -2.392600 |
| 6  | 0.000000  | 2.031404  | -2.170217 |
| 6  | 1.426581  | 2.320724  | -1.528216 |
| 1  | 1.381208  | 3.260140  | -0.974444 |
| 1  | 2.067229  | 2.524987  | -2.392600 |
| 6  | -1.426913 | 2.320676  | 1.528038  |
| 1  | -2.067229 | 2.524403  | 2.392790  |
| 1  | -1.382086 | 3.260373  | 0.974667  |
| 6  | 0.000000  | 2.031768  | 2.169860  |
| 6  | 1.426913  | 2.320676  | 1.528038  |
| 1  | 2.067229  | 2.524403  | 2.392790  |
| 1  | 1.382086  | 3.260373  | 0.974667  |
| 1  | -2.298098 | 0.000000  | 2.448466  |
| 1  | 2.298098  | -0.000000 | 2.448466  |
| 1  | -2.297222 | 0.000000  | -2.448740 |
| 1  | 2.297222  | -0.000000 | -2.448740 |
| 1  | 0.000000  | 2.672515  | -3.057286 |
| 1  | 0.000000  | 1.011379  | -2.561386 |
| 1  | 0.000000  | 2.673297  | 3.056499  |
| 1  | 0.000000  | 1.011855  | 2.561497  |
| 1  | -0.000000 | -1.011855 | 2.561497  |
| 1  | -0.000000 | -2.673297 | 3.056499  |
| 1  | -0.000000 | -1.011379 | -2.561386 |
| 1  | -0.000000 | -2.672515 | -3.057286 |
| 18 | 0.000000  | 0.000000  | 0.000960  |

# Kr@[3<sub>4</sub>](1,2,4,5) – (Kr@5a)

|    |           |           |           |
|----|-----------|-----------|-----------|
| 6  | -2.433883 | 0.000000  | 1.363888  |
| 6  | -2.184365 | 1.223099  | 0.706883  |
| 6  | -2.184365 | -1.223099 | 0.706883  |
| 6  | 2.433883  | -0.000000 | 1.363888  |
| 6  | 2.184365  | -1.223099 | 0.706883  |
| 6  | 2.184365  | 1.223099  | 0.706883  |
| 6  | 2.433472  | -0.000000 | -1.364239 |
| 6  | 2.184001  | -1.223011 | -0.707174 |
| 6  | 2.184001  | 1.223011  | -0.707174 |
| 6  | -2.433472 | 0.000000  | -1.364239 |
| 6  | -2.184001 | 1.223011  | -0.707174 |
| 6  | -2.184001 | -1.223011 | -0.707174 |
| 6  | -1.450744 | -2.307579 | 1.525228  |
| 1  | -1.416161 | -3.250648 | 0.976987  |
| 1  | -2.068278 | -2.508228 | 2.406933  |
| 6  | 0.000000  | -2.029352 | 2.152636  |
| 6  | 1.450744  | -2.307579 | 1.525228  |
| 1  | 1.416161  | -3.250648 | 0.976987  |
| 1  | 2.068278  | -2.508228 | 2.406933  |
| 6  | -1.450921 | -2.307612 | -1.525475 |
| 1  | -1.416838 | -3.250955 | -0.977696 |
| 1  | -2.068291 | -2.507585 | -2.407458 |
| 6  | -0.000000 | -2.029515 | -2.152664 |
| 6  | 1.450921  | -2.307612 | -1.525475 |
| 1  | 2.068291  | -2.507585 | -2.407458 |
| 1  | 1.416838  | -3.250955 | -0.977696 |
| 6  | -1.450921 | 2.307612  | -1.525475 |
| 1  | -1.416838 | 3.250955  | -0.977696 |
| 1  | -2.068291 | 2.507585  | -2.407458 |
| 6  | 0.000000  | 2.029515  | -2.152664 |
| 6  | 1.450921  | 2.307612  | -1.525475 |
| 1  | 1.416838  | 3.250955  | -0.977696 |
| 1  | 2.068291  | 2.507585  | -2.407458 |
| 6  | -1.450744 | 2.307579  | 1.525228  |
| 1  | -2.068278 | 2.508228  | 2.406933  |
| 1  | -1.416161 | 3.250648  | 0.976987  |
| 6  | 0.000000  | 2.029352  | 2.152636  |
| 6  | 1.450744  | 2.307579  | 1.525228  |
| 1  | 2.068278  | 2.508228  | 2.406933  |
| 1  | 1.416161  | 3.250648  | 0.976987  |
| 1  | -2.374175 | 0.000000  | 2.451226  |
| 1  | 2.374175  | -0.000000 | 2.451226  |
| 1  | -2.373437 | 0.000000  | -2.451556 |
| 1  | 2.373437  | -0.000000 | -2.451556 |
| 1  | -0.000000 | 2.700264  | -3.017655 |
| 1  | -0.000000 | 1.023601  | -2.579625 |
| 1  | 0.000000  | 2.700414  | 3.017468  |
| 1  | 0.000000  | 1.023651  | 2.579969  |
| 1  | -0.000000 | -1.023651 | 2.579969  |
| 1  | -0.000000 | -2.700414 | 3.017468  |
| 1  | -0.000000 | -1.023601 | -2.579625 |
| 1  | -0.000000 | -2.700264 | -3.017655 |
| 36 | 0.000000  | 0.000000  | 0.000631  |

## He@[3<sub>3</sub>](1,2,3) – (He@6a)

|   |           |           |           |
|---|-----------|-----------|-----------|
| 6 | 0.300913  | -1.281515 | 1.821073  |
| 6 | 1.301080  | -0.308445 | 1.750448  |
| 6 | -1.047694 | -0.937850 | 1.730467  |
| 6 | 0.300913  | -1.281515 | -1.821073 |
| 6 | -1.047694 | -0.937850 | -1.730467 |
| 6 | 1.301080  | -0.308445 | -1.750448 |
| 6 | -0.417192 | 1.413182  | -1.703173 |
| 6 | -1.390235 | 0.415760  | -1.724277 |
| 6 | 0.925461  | 1.033482  | -1.765503 |
| 6 | -0.417192 | 1.413182  | 1.703173  |
| 6 | 0.925461  | 1.033482  | 1.765503  |
| 6 | -1.390235 | 0.415760  | 1.724277  |
| 6 | -2.075404 | -1.986804 | 1.349875  |
| 1 | -3.070602 | -1.529758 | 1.331872  |
| 1 | -2.107777 | -2.764620 | 2.121343  |
| 6 | -1.823161 | -2.714903 | 0.000000  |
| 1 | -2.478929 | -3.592584 | 0.000000  |
| 1 | -0.801672 | -3.109632 | 0.000000  |
| 6 | -2.075404 | -1.986804 | -1.349875 |
| 1 | -3.070602 | -1.529758 | -1.331872 |
| 1 | -2.107777 | -2.764620 | -2.121343 |
| 6 | -0.789812 | 2.837938  | 1.341354  |
| 1 | -0.434468 | 3.517580  | 2.124425  |
| 1 | -1.880928 | 2.931998  | 1.324973  |
| 6 | -0.214707 | 3.363202  | 0.000000  |
| 1 | 0.870901  | 3.221359  | 0.000000  |
| 1 | -0.370198 | 4.447682  | 0.000000  |
| 6 | -0.789812 | 2.837938  | -1.341354 |
| 1 | -0.434468 | 3.517580  | -2.124425 |
| 1 | -1.880928 | 2.931998  | -1.324973 |
| 6 | 2.713161  | -0.702303 | 1.356487  |
| 1 | 3.136786  | -1.366166 | 2.118886  |
| 1 | 3.347198  | 0.190559  | 1.338882  |
| 6 | 2.848833  | -1.454384 | 0.000000  |
| 1 | 2.155593  | -2.301944 | 0.000000  |
| 1 | 3.851886  | -1.894993 | 0.000000  |
| 6 | 2.713161  | -0.702303 | -1.356487 |
| 1 | 3.136786  | -1.366166 | -2.118886 |
| 1 | 3.347198  | 0.190559  | -1.338882 |
| 1 | 0.581939  | -2.330009 | 1.757899  |
| 1 | 0.581939  | -2.330009 | -1.757899 |
| 1 | 1.695451  | 1.792682  | 1.654781  |
| 1 | 1.695451  | 1.792682  | -1.654781 |
| 1 | -2.430973 | 0.692980  | 1.577674  |
| 1 | -2.430973 | 0.692980  | -1.577674 |
| 2 | -0.004973 | -0.002613 | 0.000000  |

## Ne@[3<sub>3</sub>](1,2,3) – (Ne@6a)

|   |           |           |           |
|---|-----------|-----------|-----------|
| 6 | -0.414569 | -1.332222 | -1.967635 |
| 6 | -1.374737 | -0.310731 | -1.920347 |
| 6 | 0.948695  | -1.045986 | -1.929407 |
| 6 | -0.417969 | -1.327218 | 1.970032  |
| 6 | 0.945339  | -1.040889 | 1.933482  |
| 6 | -1.378212 | -0.306005 | 1.918659  |
| 6 | 0.419812  | 1.338042  | 1.951093  |
| 6 | 1.348841  | 0.300525  | 2.020297  |
| 6 | -0.945473 | 1.016229  | 2.002553  |

|    |           |           |           |
|----|-----------|-----------|-----------|
| 6  | 0.423634  | 1.332976  | -1.953478 |
| 6  | -0.941611 | 1.011232  | -2.006301 |
| 6  | 1.352577  | 0.295160  | -2.018708 |
| 6  | 1.923988  | -2.082008 | -1.381840 |
| 1  | 2.756300  | -2.203108 | -2.084109 |
| 1  | 1.425465  | -3.055368 | -1.327504 |
| 6  | 2.590285  | -1.760408 | 0.004381  |
| 1  | 2.901878  | -0.711476 | 0.003217  |
| 1  | 3.520717  | -2.337196 | 0.005929  |
| 6  | 1.921668  | -2.078295 | 1.390318  |
| 1  | 2.752771  | -2.197553 | 2.094335  |
| 1  | 1.423236  | -3.051798 | 1.337711  |
| 6  | 0.843808  | 2.690519  | -1.396072 |
| 1  | 0.535780  | 3.480042  | -2.090587 |
| 1  | 1.936503  | 2.737625  | -1.344963 |
| 6  | 0.236983  | 3.106001  | -0.003706 |
| 1  | -0.827963 | 2.855897  | -0.004570 |
| 1  | 0.274525  | 4.199958  | -0.005180 |
| 6  | 0.840771  | 2.694318  | 1.391109  |
| 1  | 0.531117  | 3.485580  | 2.082917  |
| 1  | 1.933561  | 2.741527  | 1.342219  |
| 6  | -2.767722 | -0.621037 | -1.384784 |
| 1  | -3.290619 | -1.274185 | -2.092591 |
| 1  | -3.350232 | 0.304923  | -1.336830 |
| 6  | -2.846890 | -1.356521 | -0.000789 |
| 1  | -2.117175 | -2.171578 | 0.000833  |
| 1  | -3.825638 | -1.847212 | -0.001123 |
| 6  | -2.770256 | -0.617703 | 1.381543  |
| 1  | -3.294317 | -1.269110 | 2.090085  |
| 1  | -3.352682 | 0.308134  | 1.330315  |
| 1  | -0.731854 | -2.357216 | -1.794039 |
| 1  | -0.734800 | -2.352683 | 1.798390  |
| 1  | -1.671078 | 1.803727  | -1.859493 |
| 1  | -1.674843 | 1.808255  | 1.852824  |
| 1  | 2.403761  | 0.533642  | -1.876858 |
| 1  | 2.400229  | 0.538866  | 1.879717  |
| 10 | 0.044158  | 0.059444  | -0.000305 |

# Ar@[3<sub>3</sub>](1,2,3) – (Ar@6a)

|   |           |           |           |
|---|-----------|-----------|-----------|
| 6 | -2.276974 | 1.273494  | -0.561755 |
| 6 | -2.189385 | 0.151784  | -1.402919 |
| 6 | -2.188308 | 1.140182  | 0.830203  |
| 6 | 2.277182  | 1.273409  | -0.560706 |
| 6 | 2.187849  | 1.140175  | 0.831208  |
| 6 | 2.190020  | 0.151637  | -1.401901 |
| 6 | 2.191116  | -1.288302 | 0.570657  |
| 6 | 2.278319  | -0.149015 | 1.381974  |
| 6 | 2.281677  | -1.120536 | -0.821295 |
| 6 | -2.191501 | -1.288293 | 0.569664  |
| 6 | -2.281050 | -1.120440 | -0.822275 |
| 6 | -2.279128 | -0.148982 | 1.380936  |
| 6 | -1.437656 | 2.227366  | 1.630094  |
| 1 | -2.043968 | 2.517357  | 2.493920  |
| 1 | -1.348027 | 3.123646  | 1.008138  |
| 6 | -0.000544 | 1.872256  | 2.252581  |
| 1 | -0.000592 | 0.818733  | 2.544494  |
| 1 | -0.000745 | 2.422752  | 3.196839  |
| 6 | 1.436817  | 2.227400  | 1.630686  |
| 1 | 2.042740  | 2.517519  | 2.494736  |
| 1 | 1.347384  | 3.123592  | 1.008573  |



|    |           |           |           |
|----|-----------|-----------|-----------|
| 6  | -1.439614 | -2.524326 | 1.111899  |
| 1  | -2.044562 | -3.418035 | 0.929536  |
| 1  | -1.352054 | -2.434208 | 2.199267  |
| 6  | -0.000212 | -2.887236 | 0.496482  |
| 1  | -0.000004 | -2.619849 | -0.563578 |
| 1  | -0.000225 | -3.980238 | 0.508028  |
| 6  | 1.438930  | -2.524330 | 1.112563  |
| 1  | 2.043926  | -3.418099 | 0.930681  |
| 1  | 1.350765  | -2.434073 | 2.199873  |
| 6  | -1.436495 | 0.299472  | -2.743716 |
| 1  | -2.041542 | 0.901490  | -3.428787 |
| 1  | -1.345837 | -0.687930 | -3.207340 |
| 6  | 0.000739  | 1.016479  | -2.743859 |
| 1  | 0.000577  | 1.790893  | -1.972457 |
| 1  | 0.000990  | 1.564727  | -3.689375 |
| 6  | 1.438055  | 0.299485  | -2.743071 |
| 1  | 2.043497  | 0.901650  | -3.427664 |
| 1  | 1.347577  | -0.687820 | -3.206940 |
| 1  | -2.056273 | 2.248451  | -0.990328 |
| 1  | 2.056904  | 2.248380  | -0.989457 |
| 1  | -2.062841 | -1.979567 | -1.452593 |
| 1  | 2.063830  | -1.979669 | -1.451718 |
| 1  | -2.059869 | -0.265480 | 2.439870  |
| 1  | 2.058490  | -0.265521 | 2.440792  |
| 18 | 0.000046  | -0.007709 | 0.000044  |

# Kr@[3<sub>3</sub>](1,2,3) – (Kr@6a)

|   |           |           |           |
|---|-----------|-----------|-----------|
| 6 | 2.358595  | 1.056693  | 0.906343  |
| 6 | 2.262801  | -0.259748 | 1.389787  |
| 6 | 2.262834  | 1.332632  | -0.468942 |
| 6 | -2.358585 | 1.056694  | 0.906346  |
| 6 | -2.262826 | 1.332638  | -0.468921 |
| 6 | -2.262800 | -0.259742 | 1.389765  |
| 6 | -2.263843 | -1.073236 | -0.918975 |
| 6 | -2.360826 | 0.255909  | -1.367224 |
| 6 | -2.359264 | -1.312633 | 0.462907  |
| 6 | 2.263842  | -1.073242 | -0.918969 |
| 6 | 2.359264  | -1.312637 | 0.462936  |
| 6 | 2.360822  | 0.255908  | -1.367248 |
| 6 | 1.466301  | 2.592245  | -0.911864 |
| 1 | 2.047905  | 3.125786  | -1.669886 |
| 1 | 1.388739  | 3.271135  | -0.056800 |
| 6 | -0.000001 | 2.450615  | -1.595160 |
| 1 | -0.000006 | 1.563254  | -2.233942 |
| 1 | -0.000003 | 3.293411  | -2.291679 |
| 6 | -1.466284 | 2.592254  | -0.911829 |
| 1 | -2.047900 | 3.125819  | -1.669826 |
| 1 | -1.388702 | 3.271122  | -0.056750 |
| 6 | 1.466640  | -2.086304 | -1.788315 |
| 1 | 2.047649  | -3.009894 | -1.871361 |
| 1 | 1.388951  | -1.685350 | -2.803787 |
| 6 | -0.000004 | -2.606452 | -1.323018 |
| 1 | -0.000007 | -2.712407 | -0.234818 |
| 1 | -0.000006 | -3.632161 | -1.701745 |
| 6 | -1.466638 | -2.086292 | -1.788328 |
| 1 | -2.047653 | -3.009877 | -1.871389 |
| 1 | -1.388938 | -1.685328 | -2.803795 |
| 6 | 1.466172  | -0.506008 | 2.701912  |
| 1 | 2.047531  | -0.116361 | 3.543157  |
| 1 | 1.388375  | -1.585933 | 2.862302  |

|    |           |           |           |
|----|-----------|-----------|-----------|
| 6  | -0.000003 | 0.157578  | 2.919207  |
| 1  | -0.000001 | 1.152652  | 2.466116  |
| 1  | -0.000007 | 0.343598  | 3.996602  |
| 6  | -1.466175 | -0.506006 | 2.701892  |
| 1  | -2.047541 | -0.116378 | 3.543141  |
| 1  | -1.388370 | -1.585932 | 2.862263  |
| 1  | 2.121124  | 1.863589  | 1.596359  |
| 1  | -2.121109 | 1.863589  | 1.596362  |
| 1  | 2.121583  | -2.313726 | 0.816432  |
| 1  | -2.121597 | -2.313730 | 0.816388  |
| 1  | 2.124345  | 0.450182  | -2.411254 |
| 1  | -2.124355 | 0.450179  | -2.411232 |
| 36 | -0.000004 | -0.000346 | -0.002352 |

# He@[3<sub>3</sub>](1,2,3) – (He@6b)

|   |           |           |           |
|---|-----------|-----------|-----------|
| 6 | 0.300913  | -1.281515 | 1.821073  |
| 6 | 1.301080  | -0.308445 | 1.750448  |
| 6 | -1.047694 | -0.937850 | 1.730467  |
| 6 | 0.300913  | -1.281515 | -1.821073 |
| 6 | -1.047694 | -0.937850 | -1.730467 |
| 6 | 1.301080  | -0.308445 | -1.750448 |
| 6 | -0.417192 | 1.413182  | -1.703173 |
| 6 | -1.390235 | 0.415760  | -1.724277 |
| 6 | 0.925461  | 1.033482  | -1.765503 |
| 6 | -0.417192 | 1.413182  | 1.703173  |
| 6 | 0.925461  | 1.033482  | 1.765503  |
| 6 | -1.390235 | 0.415760  | 1.724277  |
| 6 | -2.075404 | -1.986804 | 1.349875  |
| 1 | -3.070602 | -1.529758 | 1.331872  |
| 1 | -2.107777 | -2.764620 | 2.121343  |
| 6 | -1.823161 | -2.714903 | 0.000000  |
| 1 | -2.478929 | -3.592584 | 0.000000  |
| 1 | -0.801672 | -3.109632 | 0.000000  |
| 6 | -2.075404 | -1.986804 | -1.349875 |
| 1 | -3.070602 | -1.529758 | -1.331872 |
| 1 | -2.107777 | -2.764620 | -2.121343 |
| 6 | -0.789812 | 2.837938  | 1.341354  |
| 1 | -0.434468 | 3.517580  | 2.124425  |
| 1 | -1.880928 | 2.931998  | 1.324973  |
| 6 | -0.214707 | 3.363202  | 0.000000  |
| 1 | 0.870901  | 3.221359  | 0.000000  |
| 1 | -0.370198 | 4.447682  | 0.000000  |
| 6 | -0.789812 | 2.837938  | -1.341354 |
| 1 | -0.434468 | 3.517580  | -2.124425 |
| 1 | -1.880928 | 2.931998  | -1.324973 |
| 6 | 2.713161  | -0.702303 | 1.356487  |
| 1 | 3.136786  | -1.366166 | 2.118886  |
| 1 | 3.347198  | 0.190559  | 1.338882  |
| 6 | 2.848833  | -1.454384 | 0.000000  |
| 1 | 2.155593  | -2.301944 | 0.000000  |
| 1 | 3.851886  | -1.894993 | 0.000000  |
| 6 | 2.713161  | -0.702303 | -1.356487 |
| 1 | 3.136786  | -1.366166 | -2.118886 |
| 1 | 3.347198  | 0.190559  | -1.338882 |
| 1 | 0.581939  | -2.330009 | 1.757899  |
| 1 | 0.581939  | -2.330009 | -1.757899 |
| 1 | 1.695451  | 1.792682  | 1.654781  |
| 1 | 1.695451  | 1.792682  | -1.654781 |
| 1 | -2.430973 | 0.692980  | 1.577674  |
| 1 | -2.430973 | 0.692980  | -1.577674 |
| 2 | -0.004973 | -0.002613 | 0.000000  |

## Values of $\rho$ and $\nabla^2\rho$ at BCPs

**Table S1.** Values of  $\rho$  and  $\nabla^2\rho$  (in a.u.) at BCPs of  $\text{Ng}\cdots\text{C}_r$ ,  $\text{Ng}\cdots\pi$ , and  $\text{Ng}\cdots\text{C}_c$  interactions.

| Complex                | BCP                         |                |                      |        |                             |                |
|------------------------|-----------------------------|----------------|----------------------|--------|-----------------------------|----------------|
|                        | $\text{Ng}\cdots\text{C}_r$ |                | $\text{Ng}\cdots\pi$ |        | $\text{Ng}\cdots\text{C}_c$ |                |
|                        | $\rho$                      | $\nabla^2\rho$ |                      |        | $\rho$                      | $\nabla^2\rho$ |
| He@[3 <sub>6</sub> ]SP | 0.0298                      | 0.1566         | n/a                  | n/a    | n/a                         | n/a            |
| Ne@[3 <sub>6</sub> ]SP | 0.0340                      | 0.1813         | n/a                  | n/a    | n/a                         | n/a            |
| Ar@[3 <sub>6</sub> ]SP | 0.0437                      | 0.1857         | n/a                  | n/a    | 0.0116                      | 0.0472         |
| Kr@[3 <sub>6</sub> ]SP | 0.0415                      | 0.1534         | n/a                  | n/a    | 0.0108                      | 0.0399         |
| He@3a                  | 0.0278                      | 0.1453         | n/a                  | n/a    | n/a                         | n/a            |
| He@4a                  | 0.0264                      | 0.1374         | n/a                  | n/a    | n/a                         | n/a            |
| He@5a                  | n/a                         | n/a            | 0.0251               | 0.1299 | n/a                         | n/a            |
| Ar@5a                  | n/a                         | n/a            | 0.0347               | 0.1436 | 0.0130                      | 0.0568         |
| Kr@5a                  | n/a                         | n/a            | 0.0385               | 0.1347 | 0.0169                      | 0.0650         |
| He@6a                  | 0.0234                      | 0.1252         | n/a                  | n/a    | n/a                         | n/a            |
| Ne@6a                  | 0.0271                      | 0.1375         | n/a                  | n/a    | n/a                         | n/a            |
| Ar@6a                  | 0.0292                      | 0.1257         | n/a                  | n/a    | 0.0144                      | 0.0622         |
| Kr@6a                  | 0.0318                      | 0.1193         | n/a                  | n/a    | 0.0181                      | 0.0686         |
| He@6b                  | 0.0238                      | 0.1264         | n/a                  | n/a    | n/a                         | n/a            |
